# Supplementary material
Source: ML conference proceedings conference paper supplement (https://proceedings.neurips.cc/paper_files/paper/2016/hash/357a6fdf7642bf815a88822c447d9dc4-Abstract.html)
Supplement: Supplementary file [file 357a6fdf7642bf815a88822c447d9dc4-Supplemental.zip]

328 **Supplementary Material for “A Constant Factor Bi-Criteria Approximation**  
 329 **Guarantee for  $k$ -means++”**

330 The following appendices provide proofs omitted from the main manuscript. Equation numbers and  
 331 other labels refer back to the main manuscript.

332 **A Proof of Lemma 4**

333 The proof follows the inductive proof of [4, Lemma 3.3] with the notational changes  $\mathcal{X}_u \rightarrow \mathcal{U}$ ,  
 334  $\mathcal{X}_c \rightarrow \mathcal{V}$ , and  $8\phi_{\text{OPT}} \rightarrow \rho$ . For brevity, only the differences are presented.

335 For the first base case  $t = 0$ ,  $u > 0$ , [4] already shows that the lemma holds with coefficients  
 336  $1 = 1 + H_0$ ,  $0 = 1 + H_{-1}$ , and  $1 = (u - 0)/u$ . Similarly for the second base case  $t = u = 1$ , [4]  
 337 shows that  $\mathbb{E}[\phi' \mid \phi] \leq 2\phi(\mathcal{V}) + \rho(\mathcal{U}) = (1 + H_1)\phi(\mathcal{V}) + (1 + H_0)\rho(\mathcal{U})$ , as required for the stronger  
 338 version here.

339 For the first “covered” case considered in the inductive step, the argument is the same and the upper  
 340 bound on the contribution to  $\mathbb{E}[\phi' \mid \phi]$  is changed to

$$\frac{\phi(\mathcal{V})}{\phi} \left[ (1 + H_{t-1})\phi(\mathcal{V}) + (1 + H_{t-2})\rho(\mathcal{U}) + \frac{u - t + 1}{u}\phi(\mathcal{U}) \right]. \quad (15)$$

341 For the second “uncovered” case, the first displayed expression in the right-hand column of [4, page  
 342 1030] becomes (after applying the bound  $\sum_{a \in \mathcal{A}} p_a \phi_a \leq \rho(\mathcal{A})$  from Lemma 2)

$$\frac{\phi(\mathcal{A})}{\phi} \left[ (1 + H_{t-1})(\phi(\mathcal{V}) + \rho(\mathcal{A})) + (1 + H_{t-2})(\rho(\mathcal{U}) - \rho(\mathcal{A})) + \frac{u - t}{u - 1}(\phi(\mathcal{U}) - \phi(\mathcal{A})) \right].$$

343 Summing over all uncovered clusters  $\mathcal{A} \subseteq \mathcal{U}$ , the contribution to  $\mathbb{E}[\phi' \mid \phi]$  is bounded from above by

$$\begin{aligned} \frac{\phi(\mathcal{U})}{\phi} \left[ (1 + H_{t-1})\phi(\mathcal{V}) + (1 + H_{t-2})\rho(\mathcal{U}) + \frac{u - t}{u - 1}\phi(\mathcal{U}) \right] \\ + \frac{1}{\phi} \left[ (H_{t-1} - H_{t-2}) \sum_{\mathcal{A} \subseteq \mathcal{U}} \phi(\mathcal{A})\rho(\mathcal{A}) - \frac{u - t}{u - 1} \sum_{\mathcal{A} \subseteq \mathcal{U}} \phi(\mathcal{A})^2 \right]. \end{aligned}$$

344 The inner product above can be bounded as

$$\sum_{\mathcal{A} \subseteq \mathcal{U}} \phi(\mathcal{A})\rho(\mathcal{A}) \leq \phi(\mathcal{U})\rho(\mathcal{U}), \quad (16)$$

345 with equality if both  $\phi(\mathcal{U})$ ,  $\rho(\mathcal{U})$  are completely concentrated in the same cluster  $\mathcal{A}$ . The sum of  
 346 squares term can be bounded using the power-mean inequality as in [4]. Hence the contribution to  
 347  $\mathbb{E}[\phi' \mid \phi]$  is further bounded by

$$\frac{\phi(\mathcal{U})}{\phi} \left[ (1 + H_{t-1})\phi(\mathcal{V}) + (1 + H_{t-1})\rho(\mathcal{U}) + \frac{u - t}{u}\phi(\mathcal{U}) \right]. \quad (17)$$

348 Summing the bounds in (15), (17), we have

$$\mathbb{E}[\phi' \mid \phi] \leq (1 + H_{t-1})\phi(\mathcal{V}) + \left( 1 + \frac{\phi(\mathcal{V})H_{t-2} + \phi(\mathcal{U})H_{t-1}}{\phi} \right) \rho(\mathcal{U}) + \frac{u - t}{u}\phi(\mathcal{U}) + \frac{\phi(\mathcal{V})}{\phi} \frac{\phi(\mathcal{U})}{u}.$$

349 Recalling that  $\phi = \phi(\mathcal{V}) + \phi(\mathcal{U})$ , the right-hand side is seen to be increasing in  $\phi(\mathcal{U})$ . Taking the  
 350 worst case as  $\phi(\mathcal{U}) \rightarrow \phi$  gives

$$\begin{aligned} \mathbb{E}[\phi' \mid \phi] &\leq \left( 1 + H_{t-1} + \frac{1}{u} \right) \phi(\mathcal{V}) + (1 + H_{t-1})\rho(\mathcal{U}) + \frac{u - t}{u}\phi(\mathcal{U}) \\ &\leq (1 + H_t)\phi(\mathcal{V}) + (1 + H_{t-1})\rho(\mathcal{U}) + \frac{u - t}{u}\phi(\mathcal{U}) \end{aligned}$$

351 since  $1/u \leq 1/t$ . This completes the induction.

## B Remainder of Proof of Lemma 6

This appendix provides some additional details on solving for the intersection between the functions

$$B_1(\phi(\mathcal{U})) = \frac{c_{\mathcal{V}}(t, u)\phi(\mathcal{U}) + c_{\mathcal{V}}(t, u + 1)\phi(\mathcal{V})}{\phi(\mathcal{U}) + \phi(\mathcal{V})}\phi(\mathcal{V}) + \frac{c_{\mathcal{V}}(t, u)\phi(\mathcal{U}) + c_{\mathcal{U}}(t, u + 1)\phi(\mathcal{V})}{\phi(\mathcal{U}) + \phi(\mathcal{V})}\rho(\mathcal{U}),$$

$$B_2(\phi(\mathcal{U})) = \phi(\mathcal{U}) + \phi(\mathcal{V})$$

for the case that  $B_1(\phi(\mathcal{U}))$  is decreasing in  $\phi(\mathcal{U})$ . Equating  $B_1(\phi(\mathcal{U}))$  and  $B_2(\phi(\mathcal{U}))$  leads after some algebra to a quadratic equation in  $\phi(\mathcal{U})$ :

$$0 = \phi(\mathcal{U})^2 + [2\phi(\mathcal{V}) - c_{\mathcal{V}}(t, u)(\phi(\mathcal{V}) + \rho(\mathcal{U}))]\phi(\mathcal{U}) + \phi(\mathcal{V})(\phi(\mathcal{V}) - c_{\mathcal{V}}(t, u + 1)\phi(\mathcal{V}) - c_{\mathcal{U}}(t, u + 1)\rho(\mathcal{U})).$$

By the assumption  $c_{\mathcal{V}}(t, u + 1) \geq 1$ , the constant term in this quadratic equation is non-positive, implying that one of the roots is also non-positive and can be discarded. The remaining positive root is given by

$$\phi(\mathcal{U}) = \frac{1}{2}c_{\mathcal{V}}(t, u)(\phi(\mathcal{V}) + \rho(\mathcal{U})) - \phi(\mathcal{V}) + \frac{1}{2}\sqrt{Q}$$

after simplifying the discriminant to match the stated expression for  $Q$ . Evaluating either  $B_1(\phi(\mathcal{U}))$  or  $B_2(\phi(\mathcal{U}))$  at this root yields the bound in (10), as required.

## C Proof of Lemma 7

We aim to bound the quadratic function  $Q$  from above by the square  $(a\phi(\mathcal{V}) + b\rho(\mathcal{U}))^2$  for all  $\phi(\mathcal{V}), \rho(\mathcal{U})$  and some choice of  $a, b \geq 0$ . The cases  $\phi(\mathcal{V}) = 0$  and  $\rho(\mathcal{U}) = 0$  require that

$$a^2 \geq c_{\mathcal{V}}(t, u)^2 + 4(c_{\mathcal{V}}(t, u + 1) - c_{\mathcal{V}}(t, u)),$$

$$b^2 \geq c_{\mathcal{V}}(t, u)^2.$$

Setting these inequalities to equalities, the remaining condition for the cross-term is

$$ab \geq c_{\mathcal{V}}(t, u)^2 + 2(c_{\mathcal{U}}(t, u + 1) - c_{\mathcal{V}}(t, u)).$$

Equivalently for  $a, b \geq 0$ ,

$$a^2b^2 = (c_{\mathcal{V}}(t, u)^2 + 4(c_{\mathcal{V}}(t, u + 1) - c_{\mathcal{V}}(t, u)))c_{\mathcal{V}}(t, u)^2 \geq (c_{\mathcal{V}}(t, u)^2 + 2(c_{\mathcal{U}}(t, u + 1) - c_{\mathcal{V}}(t, u)))^2.$$

We rearrange to obtain

$$4(c_{\mathcal{V}}(t, u + 1) - c_{\mathcal{V}}(t, u))c_{\mathcal{V}}(t, u)^2 \geq 4c_{\mathcal{V}}(t, u)^2(c_{\mathcal{U}}(t, u + 1) - c_{\mathcal{V}}(t, u)) + 4(c_{\mathcal{U}}(t, u + 1) - c_{\mathcal{V}}(t, u))^2,$$

$$(c_{\mathcal{V}}(t, u + 1) - c_{\mathcal{U}}(t, u + 1))c_{\mathcal{V}}(t, u)^2 \geq (c_{\mathcal{U}}(t, u + 1) - c_{\mathcal{V}}(t, u))^2,$$

the last of which is true by assumption (5). Thus we conclude that

$$\sqrt{Q} \leq \sqrt{c_{\mathcal{V}}(t, u)^2 + 4(c_{\mathcal{V}}(t, u + 1) - c_{\mathcal{V}}(t, u))}\phi(\mathcal{V}) + c_{\mathcal{V}}(t, u)\rho(\mathcal{U}).$$

Combining this last inequality with Lemma 6 proves the result.

## D Proof of Lemma 8

Substituting (2) into the left-most factor in (5b),

$$\begin{aligned} c_{\mathcal{V}}(t, u + 1) - c_{\mathcal{U}}(t, u + 1) &= c_{\mathcal{V}}(t, u + 1) - c_{\mathcal{V}}(t - 1, u) \\ &= \frac{(a + 1)(u + 1)}{t - u - 1 + b} - \frac{(a + 1)u}{t - 1 - u + b} \\ &= \frac{a + 1}{t - u - 1 + b}. \end{aligned}$$

372 Similarly on the right-hand side of (5b),

$$\begin{aligned} c_{\mathcal{U}}(t, u+1) - c_{\mathcal{V}}(t, u) &= c_{\mathcal{V}}(t-1, u) - c_{\mathcal{V}}(t, u) \\ &= \frac{(a+1)u}{t-1-u+b} - \frac{(a+1)u}{t-u+b} \\ &= \frac{(a+1)u}{(t-u+b)(t-u-1+b)}. \end{aligned}$$

373 Hence

$$\begin{aligned} &(c_{\mathcal{V}}(t, u+1) - c_{\mathcal{U}}(t, u+1))c_{\mathcal{V}}(t, u)^2 - (c_{\mathcal{U}}(t, u+1) - c_{\mathcal{V}}(t, u))^2 \\ &= \frac{a+1}{t-u-1+b} \left( 1 + 2\frac{(a+1)u}{t-u+b} + \frac{(a+1)^2u^2}{(t-u+b)^2} \right) - \frac{(a+1)^2u^2}{(t-u+b)^2(t-u-1+b)^2} \\ &= \frac{a+1}{t-u-1+b} \left( 1 + 2\frac{(a+1)u}{t-u+b} \right) + \frac{(a+1)^2u^2[(a+1)(t-u-1+b)-1]}{(t-u+b)^2(t-u-1+b)^2}. \quad (18) \end{aligned}$$

374 The first of the two summands in (18) is positive for  $t > u \geq 0$ . The second summand is also  
375 non-negative as long as  $(a+1)(t-u-1+b) \geq 1$ . The most stringent case occurs for  $t = u+1$   
376 and is implied by the assumption  $ab \geq 1$ . We conclude that (18) is positive, i.e. (5b) holds.

## 377 E Proof of Lemma 9

378 First note that (2a) has the property that  $c_{\mathcal{V}}(t, u+1) \geq c_{\mathcal{V}}(t, u)$  for all  $t, u$ . Therefore (6a) is  
379 equivalent to

$$2c_{\mathcal{V}}(t+1, u+1) - c_{\mathcal{V}}(t, u) \geq \sqrt{c_{\mathcal{V}}(t, u)^2 + 4(c_{\mathcal{V}}(t, u+1) - c_{\mathcal{V}}(t, u))}. \quad (19)$$

380 Substituting (2a) into the left-hand side,

$$\begin{aligned} 2c_{\mathcal{V}}(t+1, u+1) - c_{\mathcal{V}}(t, u) &= 1 + 2\frac{(a+1)(u+1)}{t-u+b} - \frac{(a+1)u}{t-u+b} \\ &= 1 + \frac{(a+1)(u+2)}{t-u+b}, \end{aligned}$$

381 which is seen to be positive for  $t > u \geq 0$ . Hence (19) is in turn equivalent to

$$(2c_{\mathcal{V}}(t+1, u+1) - c_{\mathcal{V}}(t, u))^2 \geq c_{\mathcal{V}}(t, u)^2 + 4(c_{\mathcal{V}}(t, u+1) - c_{\mathcal{V}}(t, u)).$$

382 On the left-hand side,

$$(2c_{\mathcal{V}}(t+1, u+1) - c_{\mathcal{V}}(t, u))^2 = 1 + 2\frac{(a+1)(u+2)}{t-u+b} + \frac{(a+1)^2(u+2)^2}{(t-u+b)^2}. \quad (20)$$

383 On the right-hand side,

$$\begin{aligned} c_{\mathcal{V}}(t, u+1) - c_{\mathcal{V}}(t, u) &= \frac{(a+1)(u+1)}{t-u-1+b} - \frac{(a+1)u}{t-u+b} \\ &= \frac{(a+1)(t+b)}{(t-u+b)(t-u-1+b)} \\ &= \frac{a+1}{t-u+b} \left( 1 + \frac{u+1}{t-u-1+b} \right), \end{aligned}$$

384

$$c_{\mathcal{V}}(t, u)^2 = 1 + 2\frac{(a+1)u}{t-u+b} + \frac{(a+1)^2u^2}{(t-u+b)^2},$$

385

$$\begin{aligned} &c_{\mathcal{V}}(t, u)^2 + 4(c_{\mathcal{V}}(t, u+1) - c_{\mathcal{V}}(t, u)) \\ &= 1 + 2\frac{(a+1)(u+2)}{t-u+b} + \frac{(a+1)^2u^2}{(t-u+b)^2} + 4\frac{(a+1)(u+1)}{(t-u+b)(t-u-1+b)}. \quad (21) \end{aligned}$$

386 Subtracting (21) from (20) yields

$$\begin{aligned} & \frac{4(a+1)^2(u+1)}{(t-u+b)^2} - 4 \frac{(a+1)(u+1)}{(t-u+b)(t-u-1+b)} \\ &= 4 \frac{(a+1)(u+1) [a(t-u-1+b) - 1]}{(t-u+b)^2(t-u-1+b)}, \end{aligned}$$

387 which is non-negative provided that  $a(t-u-1+b) \geq 1$ . As in the proof of Lemma 8, the most  
 388 stringent case occurs for  $t = u + 1$  and is covered by the assumption  $ab \geq 1$ . We conclude that (20)  
 389 is at least as large as (21), i.e. (6a) holds.
